# Supplementary material
Source: HighWire-hosted journal article supplement (https://cmaj.ca/highwire/filestream/57880/field_highwire_adjunct_files/0/family-watson-appendix.pdf)
Supplement: family-watson-appendix.pdf [file family-watson-appendix.pdf]

**e-Appendix 1: Measures of family physician (FP) supply and workload in Winnipeg, 1991/91 to 2000/01**

| Measure                                 | Fiscal year (ending Mar. 31) |         |         |         |         |         |         |         |         |         | Relative change (%) |       |
|-----------------------------------------|------------------------------|---------|---------|---------|---------|---------|---------|---------|---------|---------|---------------------|-------|
|                                         | 1991/92                      | 1992/93 | 1993/94 | 1994/95 | 1995/96 | 1996/97 | 1997/98 | 1998/99 | 1999/00 | 2000/01 | 10 yr*              | 3 yr† |
| <b>Supply</b>                           |                              |         |         |         |         |         |         |         |         |         |                     |       |
| No. of FPs                              | 634                          | 632     | 648     | 654     | 651     | 614     | 597     | 590     | 599     | 605     | -5                  | +3    |
| FPs/100 000 population                  | 97                           | 97      | 99      | 100     | 100     | 94      | 92      | 91      | 92      | 92      | -5                  | +1    |
| Population/FP                           | 1031                         | 1034    | 1011    | 1000    | 1002    | 1061    | 1088    | 1102    | 1090    | 1083    | +5                  | -2    |
| No. of FP FTEs                          | 470                          | 463     | 454     | 460     | 445     | 439     | 438     | 448     | 445     | 454     | -3                  | +1    |
| FP FTEs/100 000 population              | 72                           | 71      | 69      | 70      | 68      | 67      | 67      | 69      | 68      | 69      | -4                  | 0     |
| <b>Workload</b>                         |                              |         |         |         |         |         |         |         |         |         |                     |       |
| % of FPs who worked part-time‡          | 56                           | 57      | 60      | 58      | 60      | 57      | 58      | 56      | 56      | 56      | 0                   | 0     |
| No. of visits/full-time day§ per FP     | 27.9                         | 27.5    | 27.1    | 27.6    | 27.1    | 27.2    | 27.4    | 28.1    | 27.6    | 27.8    | 0                   | -1    |
| Annual no. of visits per FP             | 4198                         | 4170    | 3932    | 4015    | 3949    | 4139    | 4227    | 4441    | 4163    | 4193    | 0                   | -6    |
| Activity ratio (sum of FTEs/no. of FPs) | 0.74                         | 0.73    | 0.70    | 0.70    | 0.68    | 0.72    | 0.73    | 0.76    | 0.74    | 0.75    | +1                  | -1    |

Note: FTE = full-time equivalent.

\*From 1991/92 to 2000/01.

†From 1998/99 to 2000/01.

‡FPs who worked less than 1.0 FTE.

§Days on which billings totalled \$200 or more in constant dollars.
